# Supplementary material for: Liquid chromatography and mass spectrometric studies of gilteritinib fumarate and characterization of its major degradation products by NMR
Source: Royal Society of Chemistry journal article supplement (doi:10.1039/d4ay01094a), 2024-01-01
Supplement: d4ay01094a1.pdf [file d4ay01094a1.pdf]

# Liquid chromatography and mass spectrometric studies of gilteritinib fumarate and characterization of its major degradation product by NMR

Bhuvaneshwari Vuyyala<sup>1,2</sup>, Krishna Prasad Pisini<sup>1,2</sup>, Debasish Swain<sup>1,2\*</sup>

<sup>1</sup>*Department of Analytical and Structural Chemistry, CSIR-Indian Institute of Chemical Technology, Hyderabad India 500 007.*

<sup>2</sup>*Academy of Scientific and Innovative Research (AcSIR), Ghaziabad – 201002, India*

*Address for Correspondence\*:*

**Dr Debasish Swain**

Scientist

Dept. of Analytical and Structural Chemistry

CSIR-Indian Institute of Chemical Technology (IICT)

India 500 007

E-mail: [debasish@iict.res.in](mailto:debasish@iict.res.in)

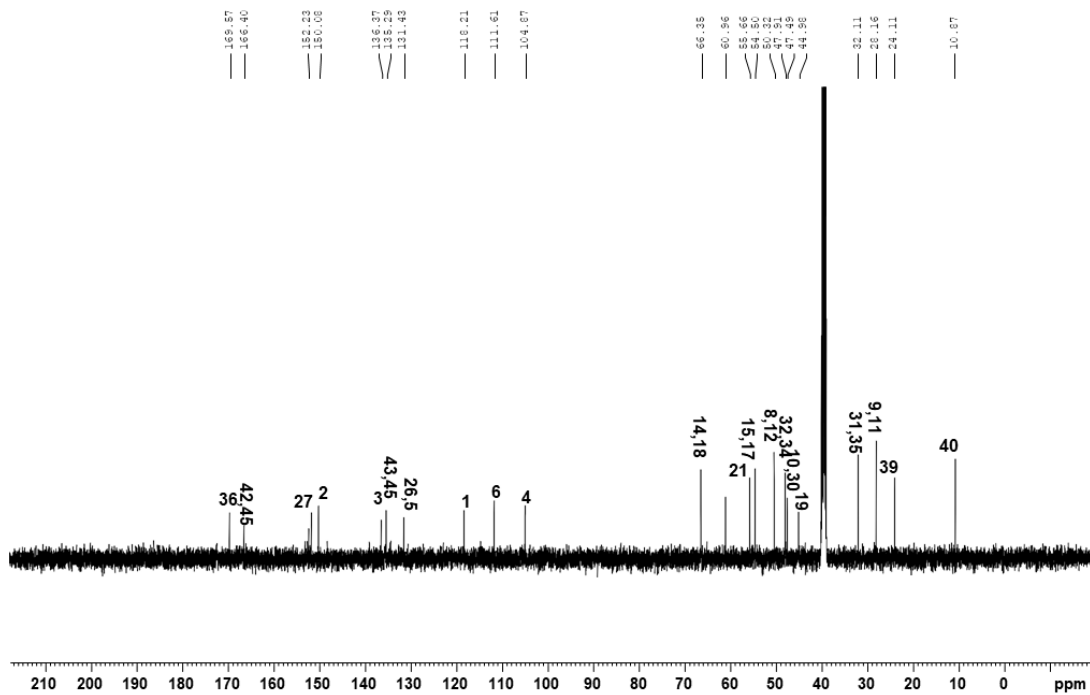

Figure S1:  $^{13}\text{C}$  spectrum of GTB

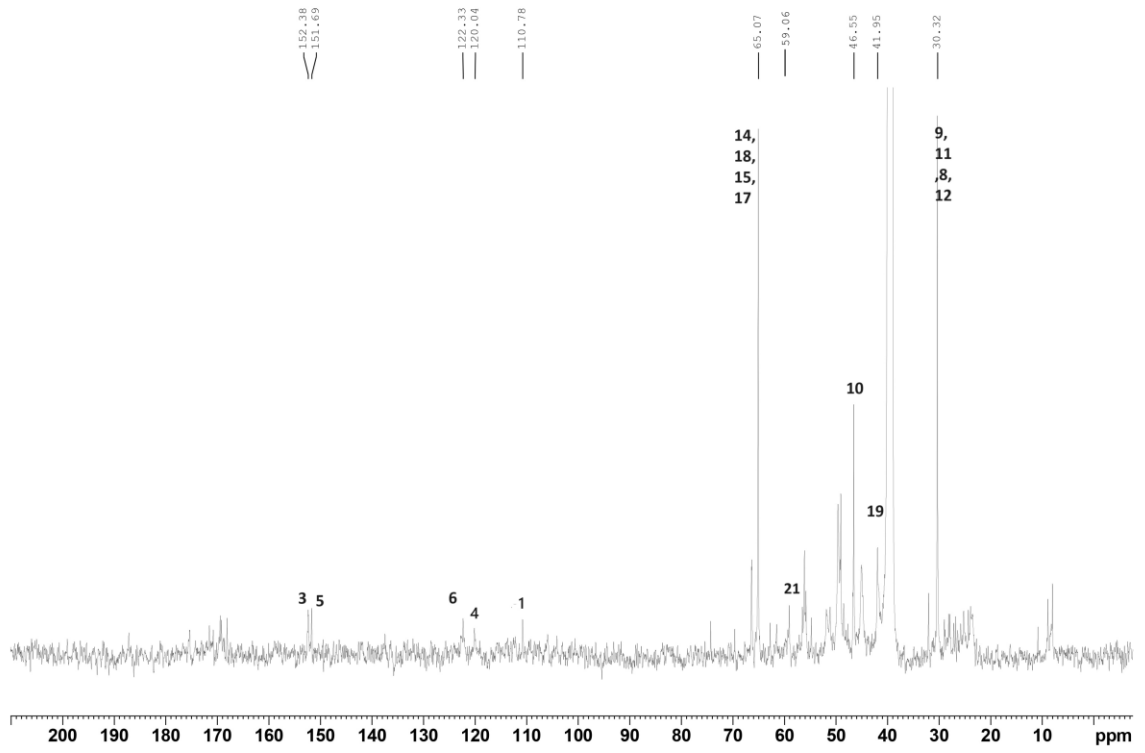

Figure S2:  $^{13}\text{C}$  spectrum of DP-1

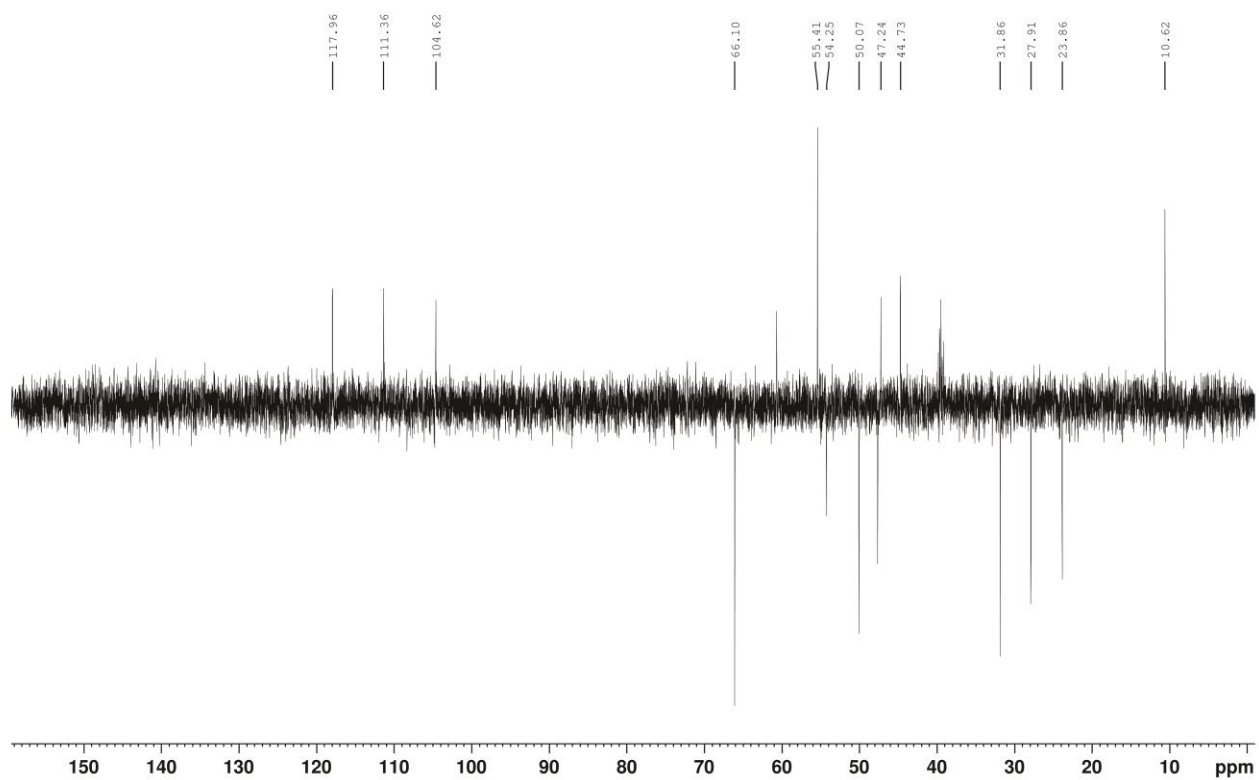

Figure S3: DEPT-135 spectrum of GTB

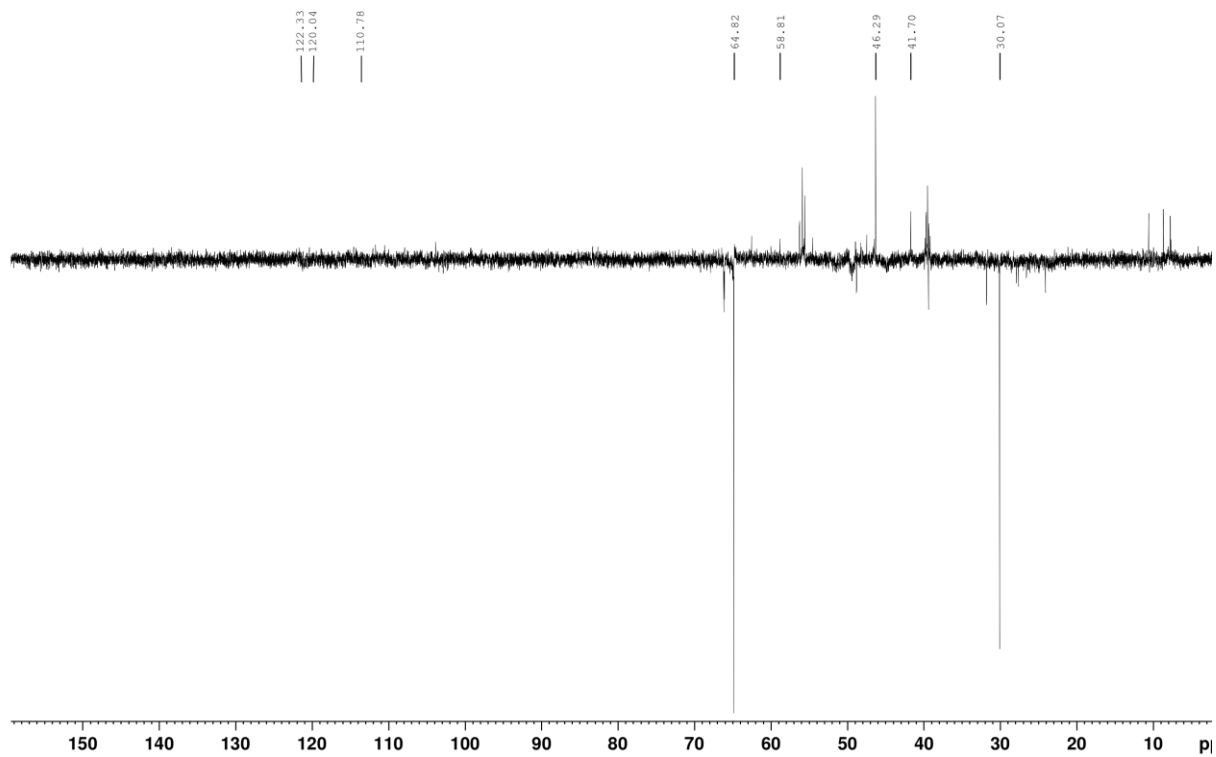

Figure S4: DEPT-135 spectrum of DP-1

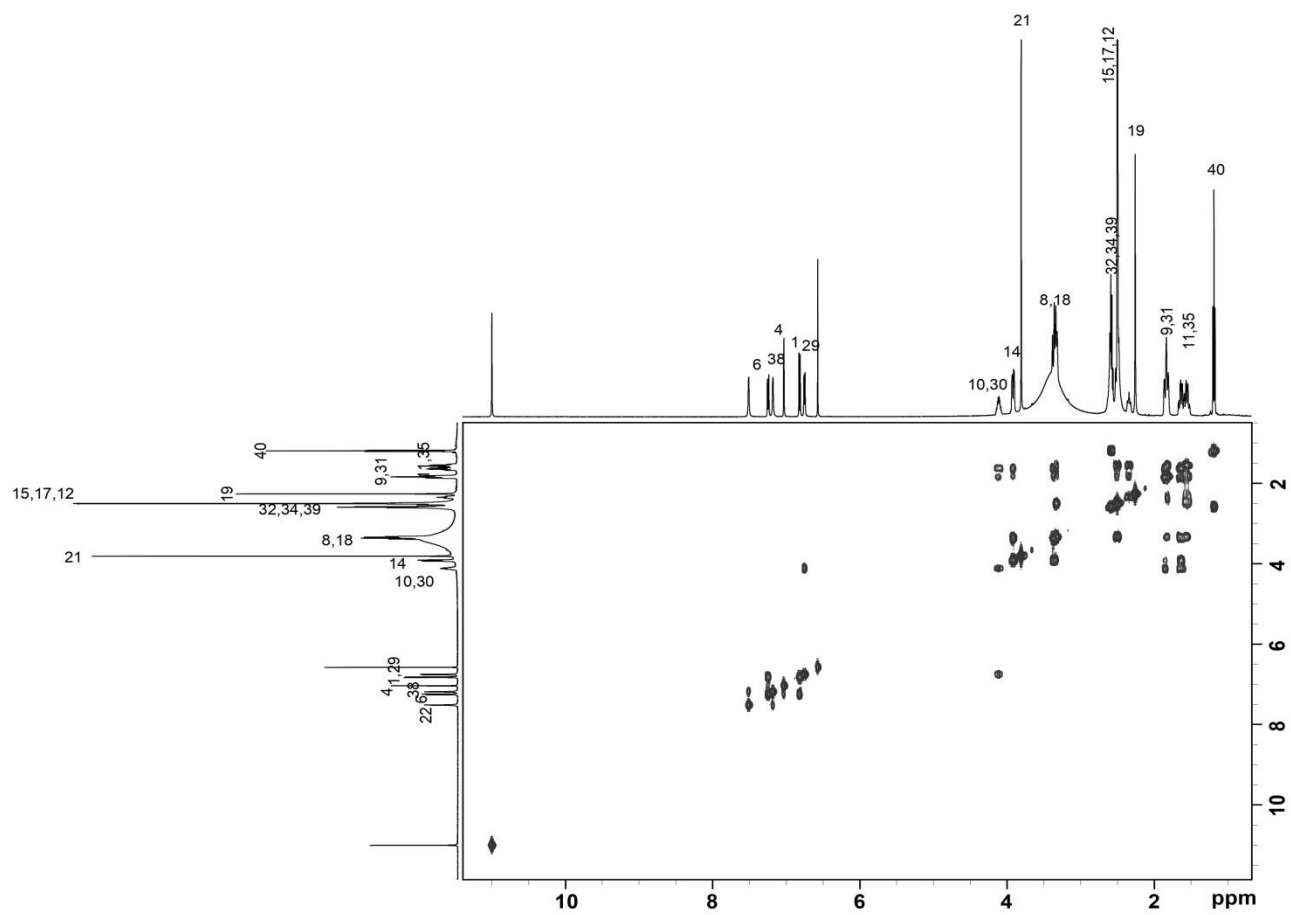

Figure S5:  $^1\text{H}$ - $^1\text{H}$  COSY spectrum of GTB

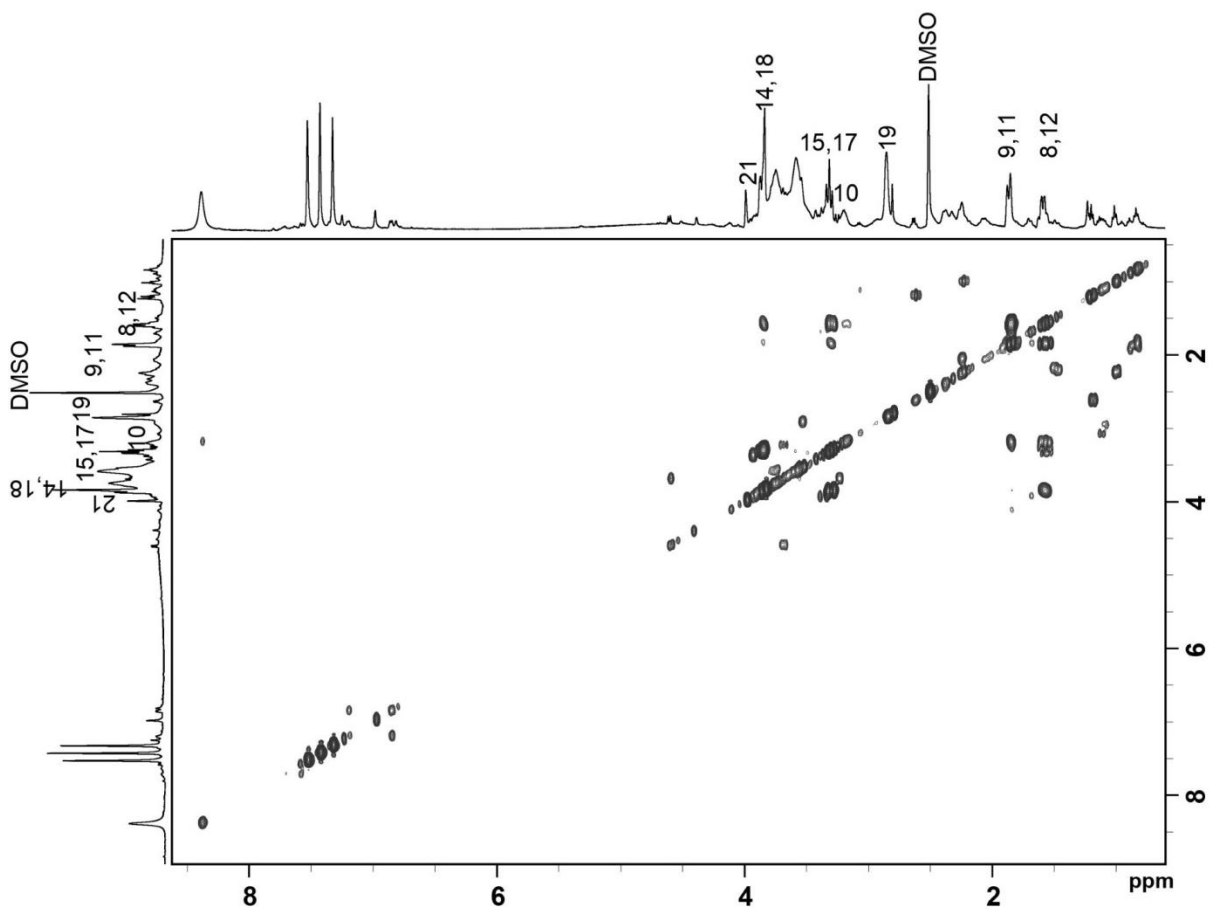

Figure S6:  $^1\text{H}$ - $^1\text{H}$  COSY spectrum of DP-1

**Table S1: Accurate mass data of GTB, its degradation products and their daughter ions**

| Name | Theoretical m/z | Experimental m/z | Error (in ppm) |
|------|-----------------|------------------|----------------|
| GTB  | 553.3609        | 553.3618         | -1.6           |
|      | 536.3344        | 536.3367         | -4.3           |
|      | 453.2609        | 453.2602         | 1.5            |
|      | 436.2343        | 436.2343         | 0.0            |
|      | 382.1874        | 382.187          | 1.0            |
|      | 367.1765        | 367.1737         | 7.6            |
|      | 325.1659        | 325.1629         | 9.2            |
| DP 1 | 305.2336        | 305.2326         | 3.3            |
|      | 205.1336        | 205.1325         | 5.4            |
|      | 151.0866        | 151.0867         | -0.7           |
|      | 190.1101        | 190.1085         | 8.4            |
|      | 177.1023        | 177.1018         | 2.8            |
| DP2  | 427.2816        | 427.2818         | -0.5           |
|      | 327.1816        | 327.181          | 1.8            |
|      | 312.1581        | 312.154          | 13.1           |
|      | 273.1347        | 273.1355         | -2.9           |
|      | 299.1503        | 299.1522         | -6.4           |
|      | 258.1117        | 258.1172         | -21.3          |
| DP 3 | 470.2874        | 470.2885         | -2.3           |
|      | 370.1874        | 370.1878         | -1.1           |
|      | 353.1609        | 353.1609         | 0.0            |
|      | 299.1139        | 299.1133         | 2.0            |
|      | 341.1973        | 341.1951         | 6.4            |
|      | 284.0904        | 284.1007         | -36.3          |
| DP 4 | 569.3558        | 569.3569         | -1.9           |
|      | 552.3531        | 552.3513         | 3.3            |
|      | 452.2531        | 452.2499         | 7.1            |
|      | 437.2296        | 437.2308         | -2.7           |
|      | 508.3031        | 508.2988         | 8.5            |
|      | 425.2296        | 425.2251         | 10.6           |
|      | 369.167         | 369.1529         | 38.2           |
|      | 204.1132        | 204.099          | 69.6           |
|      | 585.3507        | 585.3502         | 0.9            |
| DP 5 | 550.3375        | 550.3329         | 8.4            |
|      | 451.2452        | 451.2451         | 0.2            |
|      | 436.2344        | 436.2343         | 0.2            |
|      | 425.2296        | 425.2293         | 0.7            |
|      | 408.2031        | 408.2015         | 3.9            |
|      | 382.1874        | 382.187          | 1.0            |



**Table S2:**  $^1\text{H}$  NMR Data of GTB

| <b>Chemical shifts(ppm)</b> | <b>Group</b>               | <b>Multiplicity</b> |
|-----------------------------|----------------------------|---------------------|
| 11.01                       | OH(FA)                     | s                   |
| 7.46                        | NH(22)                     | s                   |
| 7.19                        | CH(4)                      | s                   |
| 7.14                        | NH <sub>2</sub>            | d                   |
| 6.96                        | CH(6)                      | d                   |
| 6.75                        | CH(1)                      | d                   |
| 6.7                         | NH                         | s                   |
| 6.50                        | H(FA)                      | s                   |
| 4.05                        | CH(10,30)                  | m                   |
| 3.86                        | CH <sub>2</sub> (14)       | d                   |
| 3.70                        | CH <sub>3</sub> (21)       | s                   |
| 3.32                        | CH <sub>2</sub> (8,18)     | d                   |
| 2.51                        | CH <sub>2</sub> (32,3439)  | m                   |
| 2.27                        | CH <sub>2</sub> (12,15,17) | m                   |
| 2.19                        | CH <sub>3</sub> (19)       | s                   |
| 1.78                        | CH <sub>2</sub> (9,31)     | m                   |
| 1.52                        | CH <sub>2</sub> (11,35)    | m                   |
| 1.12                        | CH <sub>3</sub> -40        | t                   |

**Table S3:**  $^1\text{H}$  NMR Data of DP-1

| <b>Chemical shift</b> | <b>Group</b> | <b>Multiplicity</b> |
|-----------------------|--------------|---------------------|
| 8.38                  | NH2(22)      | s                   |
| 7.25                  | CH(4)        | s                   |
| 7.20                  | CH(6)        | d                   |
| 7.01                  | CH(1)        | s                   |
| 4.01                  | CH3(21)      | s                   |
| 3.87                  | CH2(14,18)   | m                   |
| 3.32                  | CH2(15,17)   | m                   |
| 3.25                  | CH(10)       | m                   |
| 2.86                  | CH3(19)      | s                   |
| 1.92                  | CH2(9,12)    | m                   |
| 1.66                  | CH2(8,12)    | m                   |

**Table S4:**  $^{13}\text{C}$  NMR and DEPT-135 of GTB

| <b>Carbon number</b> | <b><math>^{13}\text{C}</math>(ppm)</b> | <b>DEPT-135</b>            |
|----------------------|----------------------------------------|----------------------------|
| C-1                  | 118.21                                 | CH(positive)               |
| C-6                  | 111.61                                 | CH(positive)               |
| C-4                  | 104.87                                 | CH(positive)               |
| C-14,C-18            | 66.35                                  | CH <sub>2</sub> (negative) |
| C-21                 | 56.66                                  | CH <sub>3</sub> (positive) |
| C-15,C-17            | 54.60                                  | CH <sub>2</sub> (negative) |
| C-8,C-12             | 47.91                                  | CH <sub>2</sub> (negative) |
| C-32,C-34            | 47.49                                  | CH <sub>2</sub> (negative) |
| C-10,C-30            | 44.98                                  | CH(positive)               |
| C-19                 | 40.02                                  | CH <sub>3</sub> (positive) |
| C-31,C-35            | 32.11                                  | CH <sub>2</sub> (negative) |
| C-9,C-11             | 26.16                                  | CH <sub>2</sub> (negative) |
| C-39                 | 24.11                                  | CH <sub>2</sub> (negative) |
| C-40                 | 10.87                                  | CH <sub>3</sub> (positive) |

**Table S5:**  $^{13}\text{C}$  NMR and DEPT-135 of DP-1

| <b>Carbon number</b> | <b><math>^{13}\text{C}</math></b> | <b>DEPT-135</b>            |
|----------------------|-----------------------------------|----------------------------|
| C-1                  | 110.78                            | CH (positive)              |
| C-4                  | 120.04                            | CH (positive)              |
| C-6                  | 122.33                            | CH (positive)              |
| C-14,C-18,C-15,C-17  | 65.07                             | CH <sub>2</sub> (negative) |
| C-21                 | 59.06                             | CH <sub>3</sub> (positive) |
| C-10                 | 46.55                             | CH (positive)              |
| C-19                 | 41.95                             | CH <sub>3</sub> (positive) |
| C-9,C-11,C-8,C-12    | 30.32                             | CH <sub>2</sub> (negative) |
